# Supplementary material
Source: Springer Nature journal article supplement (https://www.springermedizin.de/resource/supplementary/12958_2010_769_MOESM1_ESM.pdf/9568458)

Lab A (0 days) v. Lab B (2 years)

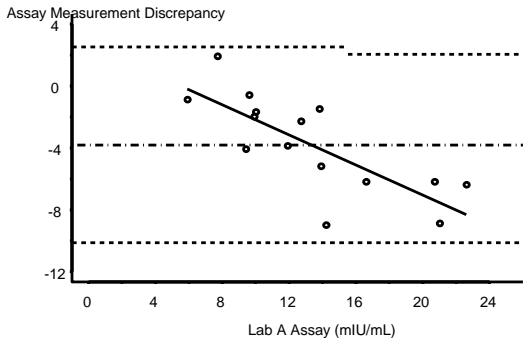

Lab A (0 days) v. Lab C (2 years)

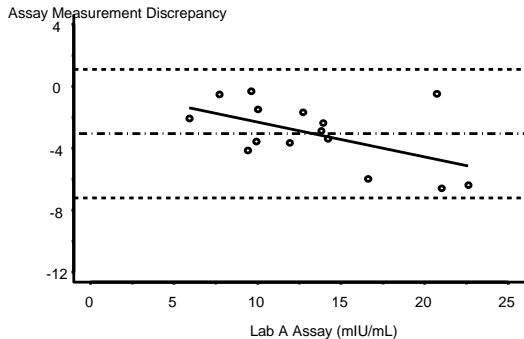

Lab A (0 days) v. Lab B (45 days)

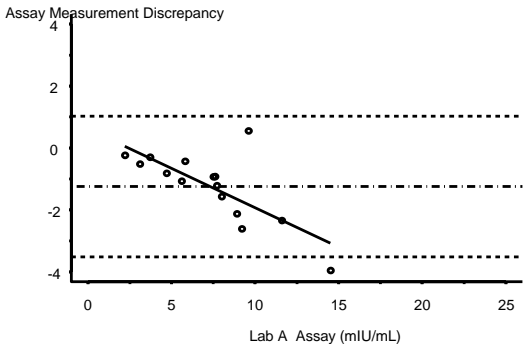

Lab A (0 days) vs. Lab C (45 days)

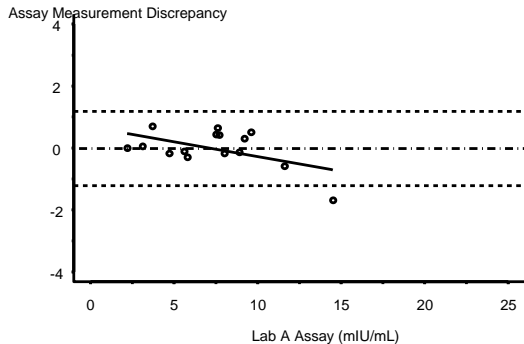

Supplement: MOESM1 [file 9568458]
